# Supplementary material
Source: PubMed Central journal article supplement (PMC7977730)
Supplement: ryct190216suppa1.pdf [file ryct190216suppa1.pdf]

**Table E1. Image processing and image biomarker extraction based on the Image Biomarker Standardization Initiative (IBSI) reporting guidelines.**

|                                          |                                                                                                                                                                                                       |                |            |             |             |
|------------------------------------------|-------------------------------------------------------------------------------------------------------------------------------------------------------------------------------------------------------|----------------|------------|-------------|-------------|
| Patient                                  |                                                                                                                                                                                                       |                |            |             |             |
| Region of interest                       | Myocardium                                                                                                                                                                                            |                |            |             |             |
| Patient preparation                      | Breath-hold instructions given to volunteers and patients prior to image acquisition                                                                                                                  |                |            |             |             |
| Contrast agent                           | No contrast agent was administered to the volunteer/patient                                                                                                                                           |                |            |             |             |
| Comorbidities                            | No comorbidities that effect imaging quality                                                                                                                                                          |                |            |             |             |
| Acquisition                              |                                                                                                                                                                                                       |                |            |             |             |
| Acquisition protocol                     | Standard clinical cardiac MRI imaging protocol was used                                                                                                                                               |                |            |             |             |
| MR imaging unit type                     | 3T Siemens Vida (Siemens Healthineers, Erlangen, Germany)                                                                                                                                             |                |            |             |             |
| Imaging modality                         | MRI                                                                                                                                                                                                   |                |            |             |             |
| Static and dynamic imaging               | Scans were static except for cine-bSSFP                                                                                                                                                               |                |            |             |             |
|                                          | Acquisition time per time frame for cine-bSSFP: 49.92 msec                                                                                                                                            |                |            |             |             |
|                                          | No temporal modeling technique was used                                                                                                                                                               |                |            |             |             |
| MRI unit calibration                     | Weekly and annual phantom testing and Siemens preventive services                                                                                                                                     |                |            |             |             |
| Patient instruction                      | Patients were given instructions for breath holding during acquisition                                                                                                                                |                |            |             |             |
| Anatomic motion correction               | ECG-gated; breath-hold                                                                                                                                                                                |                |            |             |             |
| Examination duration                     | ~1 hour for healthy volunteers and ~30 min for patients                                                                                                                                               |                |            |             |             |
| RF coil                                  | 18-channel body coil (Siemens Healthineers, Erlangen, Germany)                                                                                                                                        |                |            |             |             |
| Magnetic field strength                  | 3 T                                                                                                                                                                                                   |                |            |             |             |
| Imaging sequence                         | Cine-bSSFP                                                                                                                                                                                            | MOLLI 5s(3s)3s | T2 map     | T1-weighted | T2-weighted |
| Repetition time (msec)                   | 3.12                                                                                                                                                                                                  | 2.47           | 3.09       | 4.57        | 718         |
| Echo time (msec)                         | 1.41                                                                                                                                                                                                  | 1.02           | 1.3        | 2.46        | 50          |
| Echo train length                        |                                                                                                                                                                                                       |                |            |             | 177         |
| Flip angle (deg)                         | 40                                                                                                                                                                                                    | 35             | 12         | 15          | 180         |
| Acquisition type                         | Tfl 2D trufi                                                                                                                                                                                          | Tfl 2D trufi   | Tfl 2D Gre | Fl 2D Gre   | 2D TSE      |
| k-space traversal                        | Linear                                                                                                                                                                                                | Linear         | Centric    | Centric     | ...         |
| Number of averages                       | 1                                                                                                                                                                                                     | 1              | 1          | 1           | 1           |
| In-plane resolution (mm <sup>2</sup> )   | 0.9 × 0.9                                                                                                                                                                                             | 1.7 × 1.7      | 1.7 × 1.7  | 0.5 × 0.5   | 1.4 × 1.4   |
| Image section thickness (mm)             | 8                                                                                                                                                                                                     | 8              | 8          | 8           | 8           |
| Image section spacing (mm)               | 16                                                                                                                                                                                                    | 16             | 16         | 16          | 16          |
| Reconstruction model (Factor)            | GRAPPA (2)                                                                                                                                                                                            | GRAPPA (2)     | GRAPPA (2) | GRAPPA (2)  | GRAPPA (2)  |
| Image Processing                         |                                                                                                                                                                                                       |                |            |             |             |
| Registration method                      | Siemens in-line motion correction was used for parametric mapping                                                                                                                                     |                |            |             |             |
| Data conversions                         | Siemens in-line parametric mapping reconstruction was used                                                                                                                                            |                |            |             |             |
| Postacquisition processing               |                                                                                                                                                                                                       |                |            |             |             |
| Antialiasing                             | None                                                                                                                                                                                                  |                |            |             |             |
| Noise suppression                        | None                                                                                                                                                                                                  |                |            |             |             |
| Nonuniformity correction                 | None                                                                                                                                                                                                  |                |            |             |             |
| Image normalization                      | mean ± 3SD normalization for cine-bSSFP, T1-weighted, T2-weighted                                                                                                                                     |                |            |             |             |
| Other postacquisition processing methods | None                                                                                                                                                                                                  |                |            |             |             |
| Segmentation                             |                                                                                                                                                                                                       |                |            |             |             |
| Segmentation method                      | Manually; 3 independent experts; JJ (4 years of experience in cardiac MRI), JM (6 years of experience in cardiac MRI), SK (5.5 years of experience in cardiac MRI); no consensus, independent reading |                |            |             |             |
| Conversion to mask                       | MATLAB poly2mask                                                                                                                                                                                      |                |            |             |             |

|                                                |                                                                                                                                                                                                                                               |
|------------------------------------------------|-----------------------------------------------------------------------------------------------------------------------------------------------------------------------------------------------------------------------------------------------|
| Image processing–image interpolation           |                                                                                                                                                                                                                                               |
| Interpolation method                           | SimpleITK sitkBSpline                                                                                                                                                                                                                         |
| Voxel dimensions                               | 1 × 1 × 1 mm <sup>3</sup>                                                                                                                                                                                                                     |
| Image processing–ROI interpolation             |                                                                                                                                                                                                                                               |
| Interpolation method                           | SimpleITK sitkNearestNeighbor                                                                                                                                                                                                                 |
| Partially masked voxels                        | N/A                                                                                                                                                                                                                                           |
| Image processing resegmentation methods        | Absolute; Cine-bSSFP, T1-weighted, T2-weighted: [0, 255]; T1 map: [0, 2000]; T2 map: [0, 200] for in-vivo [0, 400] for phantom                                                                                                                |
| Image processing–discretization                | Fixed bin size (FBS); 1 for T2 map, exponential, and LBP images, 5 for the rest; the lowest intensity in the first bin for FBS discretization is set by range resegmentation                                                                  |
| Image processing-filter                        | Original = {}, Wavelet = {}, Square = {}, SquareRoot = {}, Logarithm = {}, Exponential = {binCount: 50}, Gradient = {}, LBP2D = {binWidth: 1}                                                                                                 |
| Image biomarker computation                    |                                                                                                                                                                                                                                               |
| Biomarker set                                  | Intensity-based statistics (IS), gray level co-occurrence matrix (GLCM), gray level run length matrix (GLRLM), gray level size zone matrix (GLSZM), gray level distance zone matrix (GLDZM), neighborhood gray tone difference matrix (NGTDM) |
| IBSI compliance                                | Compliant with the IBSI benchmarks                                                                                                                                                                                                            |
| Robustness                                     | Test/retest analysis and inter/intraobserver analysis                                                                                                                                                                                         |
| Software availability                          | PyRadiomics 2.1.2                                                                                                                                                                                                                             |
|                                                | Numpy 1.16.2                                                                                                                                                                                                                                  |
|                                                | SimpleITK 1.2.0                                                                                                                                                                                                                               |
|                                                | PyWavelet 1.0.2                                                                                                                                                                                                                               |
|                                                | Python 3.6.8                                                                                                                                                                                                                                  |
| Image biomarker computation–texture parameters |                                                                                                                                                                                                                                               |
| Texture matrix aggregation                     | 2.5D, direction-merged                                                                                                                                                                                                                        |
| Distance weighting                             | No weighting                                                                                                                                                                                                                                  |
| CM symmetry                                    | Symmetric                                                                                                                                                                                                                                     |
| CM distance                                    | Chebyshev distance of 1                                                                                                                                                                                                                       |
| SZM linkage distance                           | Chebyshev distance of 1                                                                                                                                                                                                                       |
| DZM linkage distance                           | Chebyshev distance of 1                                                                                                                                                                                                                       |
| DZM zone distance norm                         | Manhattan distance                                                                                                                                                                                                                            |
| NGTDM distance                                 | Chebyshev distance of 1                                                                                                                                                                                                                       |

**Table E2. Demographics, clinical indications and diagnosis of 51 patients who were referred for clinical cardiac MRI.**

| Age | Sex | Indications                                                                     | Diagnosis                                                                   |
|-----|-----|---------------------------------------------------------------------------------|-----------------------------------------------------------------------------|
| 64  | M   | Cardiomyopathy, ARVC                                                            | Normal                                                                      |
| 72  | M   | Thrombus                                                                        | Ischemic cardiomyopathy, No left ventricular thrombus                       |
| 56  | M   | Cardiomyopathy, Pre-ICD implantation                                            | Mixed ischemic and nonischemic cardiomyopathy                               |
| 59  | M   | Cardiomyopathy, Sarcoidosis                                                     | Not suggestive of cardiac sarcoidosis                                       |
| 62  | F   | Cardiomyopathy, Hypertrophic cardiomyopathy, LVOT obstruction                   | Hypertrophic cardiomyopathy                                                 |
| 66  | M   | Cardiomyopathy, Coronary artery disease                                         | Nonischemic cardiomyopathy                                                  |
| 68  | F   | Systolic dysfunction/cardiomyopathy, Coronary artery disease versus myocarditis | Nonischemic cardiomyopathy                                                  |
| 39  | F   | Stroke, Patent foramen ovale                                                    | Normal                                                                      |
| 57  | F   | Thrombus, Left ventricular function                                             | Ischemic cardiomyopathy without left ventricular thrombus                   |
| 35  | F   | Cardiomyopathy, Abnormal ECG                                                    | Concerning for ARVC or other nonischemic cardiomyopathy                     |
| 62  | F   | Cardiomyopathy, Hemochromatosis                                                 | Not suggestive of cardiac hemochromatosis                                   |
| 28  | M   | Aortic valve disease, Aorta, LV size and function                               | Bicuspid aortic valve with moderate to severe aortic regurgitation          |
| 53  | M   | LV non compaction                                                               | Not suggest left ventricular noncompaction.                                 |
| 49  | M   | Evaluation of the aorta, and LV                                                 | Mild dilation of the aortic sinus without dilation or dissection, normal LV |

|    |   |                                                                      |                                                                                                                            |
|----|---|----------------------------------------------------------------------|----------------------------------------------------------------------------------------------------------------------------|
| 60 | F | Constrictive pericarditis, perimyocarditis                           | Early and late gadolinium pericardial enhancement without evidence of constriction                                         |
| 63 | M | MVP, Hx of NSVT Evaluate for scar                                    | Nonischemic cardiomyopathy                                                                                                 |
| 67 | M | Left ventricular function                                            | Normal left ventricular cavity size with dyssynchrony and mild global hypokinesis                                          |
| 42 | M | Cardiomyopathy, Sarcoid                                              | No CMR findings of cardiac sarcoidosis or cardiomyopathy                                                                   |
| 42 | M | Cardiomyopathy                                                       | Mild nonischemic cardiomyopathy                                                                                            |
| 39 | M | Cardiomyopathy, LV Function, Thrombus                                | Severe left ventricular cavity dilation, and severe global systolic dysfunction.                                           |
| 25 | M | Cardiomyopathy, Hypertrophic cardiomyopathy                          | Athletic heart                                                                                                             |
| 50 | F | Source of VT, Scar/fibrosis                                          | Normal                                                                                                                     |
| 65 | M | Cardiac mass versus thrombus                                         | Moderate mitral annular calcification without overlying mass                                                               |
| 56 | M | Bicuspid AV, Ascending aorta aneurysm, Cardiomyopathy, Fibrosis/scar | Nonischemic cardiomyopathy                                                                                                 |
| 28 | F | Cardiomyopathy, Fibrosis/Scar                                        | Mildly increased left ventricular cavity size with low normal systolic function                                            |
| 65 | F | RA, Progressive DOE. Rule out pericarditis/constriction              | Pericarditis and/or pericardial scarring but not constriction                                                              |
| 75 | M | Evaluation of pericardial constriction                               | Large pericardial effusion with no evidence of tamponade or early/late pericardial enhancement                             |
| 58 | M | Suspicion of myocarditis                                             | Nonischemic cardiomyopathy                                                                                                 |
| 64 | M | Ventricular tachycardia, premature ventricular contractions          | No evidence of cardiomyopathy                                                                                              |
| 67 | M | Hypertrophic cardiomyopathy                                          | Hypertrophic cardiomyopathy with fibrosis (LGE = 5% of LV myocardium) and LVOT obstruction                                 |
| 47 | M | Suspicion of infiltrative cardiomyopathy                             | Nonischemic dilated cardiomyopathy. No evidence of LGE                                                                     |
| 79 | M | Investigation of dilated cardiomyopathy                              | Nonischemic dilated cardiomyopathy with patchy midwall fibrosis                                                            |
| 52 | F | History of sarcoidosis                                               | No findings to suggest cardiac sarcoidosis                                                                                 |
| 37 | M | Investigation of dilated cardiomyopathy                              | Nonischemic dilated cardiomyopathy with patchy midwall fibrosis                                                            |
| 68 | F | Investigation of dilated cardiomyopathy                              | Nonischemic dilated cardiomyopathy with no evidence of scar                                                                |
| 63 | F | Investigation of dilated cardiomyopathy                              | Nonischemic dilated cardiomyopathy with no evidence of scar                                                                |
| 43 | M | Investigation of dilated cardiomyopathy                              | Normal                                                                                                                     |
| 45 | F | Hypertrophic cardiomyopathy                                          | Hypertrophic cardiomyopathy with fibrosis and LVOT obstruction                                                             |
| 74 | F | Investigation of dilated cardiomyopathy                              | Nonischemic dilated cardiomyopathy with no evidence of scar                                                                |
| 55 | M | Suspicion of cardiomyopathy                                          | Normal                                                                                                                     |
| 34 | M | History of pulmonary sarcoidosis                                     | Cardiac sarcoidosis (Midwall early and late gadolinium enhancement)                                                        |
| 51 | F | Suspicion of myocarditis                                             | Left ventricular hypertrophy with no evidence of edema, scar or dysfunction                                                |
| 76 | M | Suspicion of noncompaction cardiomyopathy                            | Normal (there is no evidence of LGE or noncompaction)                                                                      |
| 79 | M | Suspicion of cardiac contusion                                       | Normal (no evidence of LGE or edema)                                                                                       |
| 52 | M | Suspicion of ischemic cardiomyopathy                                 | Transmural apical infarct with severely dilated left ventricle and moderate systolic dysfunction (Ischemic cardiomyopathy) |
| 42 | M | Suspicion of coronary artery disease                                 | Transmural apical infarct (Ischemic cardiomyopathy)                                                                        |
| 65 | F | Suspicion of pericarditis                                            | Pericarditis without constriction                                                                                          |
| 72 | M | Suspicion of myocarditis                                             | Mildly dilated left ventricle with preserved ejection fraction. No evidence of scar.                                       |
| 55 | M | Suspicion of myocarditis                                             | Nonischemic dilated cardiomyopathy with patchy midwall fibrosis                                                            |
| 65 | M | Transient atrioventricular blockage                                  | Normal                                                                                                                     |
| 60 | M | History of pulmonary sarcoidosis                                     | Cardiac sarcoidosis (Epicardial and midwall early and late gadolinium enhancement)                                         |

**Table E3. Test-retest reproducibility results of phantom study summarized for all image filters and feature family.**

|                                        | Reproducible Image Filter                      | Reproducible Feature Family                    |
|----------------------------------------|------------------------------------------------|------------------------------------------------|
| Apple, Within-Session Repeatability    |                                                |                                                |
| Cine-bSSFP                             | Wavelet-HL ( $n = 84$ ; ICC $0.98 \pm 0.04$ )  | GLCM ( $n = 196$ ; ICC $0.98 \pm 0.03$ )       |
| T1-weighted                            | Gradient ( $n = 71$ ; ICC $0.98 \pm 0.04$ )    | GLCM ( $n = 190$ ; ICC $0.98 \pm 0.03$ )       |
| T1 map                                 | Wavelet-HL ( $n = 73$ ; ICC $0.96 \pm 0.04$ )  | GLCM ( $n = 168$ ; ICC $0.96 \pm 0.04$ )       |
| T2-weighted                            | Gradient ( $n = 90$ ; ICC $0.99 \pm 0.02$ )    | GLCM ( $n = 232$ ; ICC $1.0 \pm 0.01$ )        |
| T2 map                                 | Wavelet-HL ( $n = 53$ ; ICC $0.92 \pm 0.05$ )  | GLCM ( $n = 102$ ; ICC $0.92 \pm 0.05$ )       |
| Apple, Between-Session Reproducibility |                                                |                                                |
| Cine-bSSFP                             | Wavelet-LH ( $n = 29$ ; ICC $0.83 \pm 0.03$ )  | GLCM ( $n = 17$ ; ICC $0.84 \pm 0.03$ )        |
| T1-weighted                            | Squareroot ( $n = 2$ ; ICC $0.9 \pm 0.06$ )    | GLRLM ( $n = 5$ ; ICC $0.9 \pm 0.07$ )         |
| T1 map                                 | Logarithm ( $n = 16$ ; ICC $0.85 \pm 0.03$ )   | GLCM ( $n = 36$ ; ICC $0.85 \pm 0.03$ )        |
| T2-weighted                            | LBP-2D ( $n = 6$ ; ICC $0.88 \pm 0.05$ )       | GLCM ( $n = 7$ ; ICC $0.86 \pm 0.03$ )         |
| T2 map                                 | Square ( $n = 15$ ; ICC $0.87 \pm 0.04$ )      | GLCM ( $n = 17$ ; ICC $0.88 \pm 0.05$ )        |
| Lime, Within-Session Repeatability     |                                                |                                                |
| Cine-bSSFP                             | Wavelet-LL ( $n = 80$ ; ICC $0.99 \pm 0.02$ )  | GLCM ( $n = 163$ ; ICC $1.0 \pm 0.02$ )        |
| T1-weighted                            | Wavelet-LL ( $n = 76$ ; ICC $0.98 \pm 0.03$ )  | GLCM ( $n = 172$ ; ICC $0.97 \pm 0.05$ )       |
| T1 map                                 | Exponential ( $n = 72$ ; ICC $0.95 \pm 0.04$ ) | GLCM ( $n = 189$ ; ICC $0.95 \pm 0.05$ )       |
| T2-weighted                            | Gradient ( $n = 85$ ; ICC $0.99 \pm 0.03$ )    | GLCM ( $n = 221$ ; ICC $1.0 \pm 0.01$ )        |
| T2 map                                 | Exponential ( $n = 65$ ; ICC $0.94 \pm 0.05$ ) | Firstorder ( $n = 93$ ; ICC $0.95 \pm 0.04$ )  |
| Lime, Between-Session Reproducibility  |                                                |                                                |
| Cine-bSSFP                             | Original ( $n = 23$ ; ICC $0.85 \pm 0.04$ )    | GLCM ( $n = 27$ ; ICC $0.86 \pm 0.04$ )        |
| T1-weighted                            | Wavelet-LL ( $n = 53$ ; ICC $0.85 \pm 0.03$ )  | GLCM ( $n = 117$ ; ICC $0.87 \pm 0.05$ )       |
| T1 map                                 | Exponential ( $n = 44$ ; ICC $0.9 \pm 0.04$ )  | GLCM ( $n = 90$ ; ICC $0.87 \pm 0.04$ )        |
| T2-weighted                            | Original ( $n = 35$ ; ICC $0.84 \pm 0.03$ )    | GLCM ( $n = 47$ ; ICC $0.85 \pm 0.03$ )        |
| T2 map                                 | Logarithm ( $n = 28$ ; ICC $0.89 \pm 0.04$ )   | GLCM ( $n = 36$ ; ICC $0.9 \pm 0.04$ )         |
| Onion, Within-Session Repeatability    |                                                |                                                |
| Cine-bSSFP                             | Logarithm ( $n = 65$ ; ICC $0.99 \pm 0.02$ )   | Firstorder ( $n = 114$ ; ICC $0.99 \pm 0.01$ ) |
| T1-weighted                            | Original ( $n = 61$ ; ICC $0.98 \pm 0.03$ )    | GLCM ( $n = 145$ ; ICC $0.96 \pm 0.04$ )       |
| T1 map                                 | Logarithm ( $n = 71$ ; ICC $0.98 \pm 0.03$ )   | Firstorder ( $n = 137$ ; ICC $0.99 \pm 0.01$ ) |
| T2-weighted                            | Wavelet-HL ( $n = 74$ ; ICC $0.99 \pm 0.02$ )  | GLCM ( $n = 168$ ; ICC $0.99 \pm 0.02$ )       |
| T2 map                                 | Square ( $n = 51$ ; ICC $0.98 \pm 0.02$ )      | Firstorder ( $n = 101$ ; ICC $0.97 \pm 0.03$ ) |
| Onion, Between-Session Reproducibility |                                                |                                                |
| Cine-bSSFP                             | Square ( $n = 26$ ; ICC $0.88 \pm 0.04$ )      | Firstorder ( $n = 43$ ; ICC $0.87 \pm 0.04$ )  |
| T1-weighted                            | Original ( $n = 38$ ; ICC $0.88 \pm 0.03$ )    | GLCM ( $n = 39$ ; ICC $0.87 \pm 0.04$ )        |
| T1 map                                 | Squareroot ( $n = 23$ ; ICC $0.85 \pm 0.04$ )  | Firstorder ( $n = 63$ ; ICC $0.87 \pm 0.05$ )  |
| T2-weighted                            | Logarithm ( $n = 7$ ; ICC $0.83 \pm 0.03$ )    | GLCM ( $n = 10$ ; ICC $0.84 \pm 0.03$ )        |
| T2 map                                 | Square ( $n = 13$ ; ICC $0.83 \pm 0.02$ )      | Firstorder ( $n = 33$ ; ICC $0.85 \pm 0.04$ )  |
